# Supplementary material for: Effects of Angiopoietin-2-Blocking Antibody on Endothelial Cell–Cell Junctions and Lung Metastasis
Source: PubMed Central journal article supplement — J Natl Cancer Inst. 2012 Feb 17;104(6):461–75. doi: 10.1093/jnci/djs009 (PMC3309130; doi:10.1093/jnci/djs009), 2012-02-17
Supplement: supp_djs009_jnci-JNCI-11-0637-s02.pdf [file supp_djs009_jnci-JNCI-11-0637-s02.pdf]

**Supplementary Table 1. Primer Sequences\***

| <b>Construct</b>                                                                      | <b>Sequence</b>                                             |
|---------------------------------------------------------------------------------------|-------------------------------------------------------------|
| Primers used for cloning mTie2-ECD                                                    |                                                             |
| mTie2-F1                                                                              | CTTGTGTCTGATGCCGAAAC                                        |
| mTie2-F2                                                                              | GACCCTTACGGGTGTTCCCTG                                       |
| mTie2-F3                                                                              | ACATCAAAGTGCCTGGGAAC                                        |
| mTie2(VSV-G)-F                                                                        | CTGAGGACGCTTCCACATTC                                        |
| mTie2-R1                                                                              | GGGCACTGAGTGGATGAAGG                                        |
| mTie2-R2                                                                              | GGAGGTAAGACTCGGTTGAC                                        |
| mTie2-R3                                                                              | TTGCCCTGAACCTTATACCG                                        |
| mTie2(VSV-G)-R                                                                        | CGCACGCGTCTACTTTCCCAGCCTGTTTCATCTCGATGTCGGTGTATAGCATCTTTCCC |
| Primers used for verification of the ready mTie2-ECD construct and AAV quantification |                                                             |
| pCMV                                                                                  | GACCTCCATAGAAGACAC                                          |
| WPRE-R1                                                                               | GGCATTAAAGCAGCGTATCC                                        |
| WPRE-F                                                                                | TGAGTTTGGACAAACCACAAC                                       |
| WPRE-R                                                                                | TTGTTGTAACTTGTTTATTGCAGC                                    |
| Primers for TET-OS-Ang2 responder construct                                           |                                                             |
| mTET-OS-Ang2 TG F                                                                     | ATCCTGCCTTTCTCTTTATGGTT                                     |
| mTET-OS-Ang2 TG R                                                                     | AGCCTTTGCACTGAGTCGTCGTA                                     |
| mAng2-F1                                                                              | GGCGTCGA CGAAGACGGAGCTTGC TGACCATGATGTCATC                  |
| mAng2-R1                                                                              | GGCACGCGTTTAGAAATCTGCTGGCCGGAT                              |

\*mTie2 = mouse Tie2 (Tyrosine kinase with immunoglobulin like and EGF like domains 2); F = forward primer; R = reverse primer; VSV-G = vesicular stomatitis virus - glycoprotein G; p = plasmid; CMV = cytomegalovirus; WPRE = Woodchuck hepatitis virus posttranscriptional regulatory element; mTET-OS-Ang2 = mouse tetracycline inducible angiopoietin-2; TG = transgenic; ECD = extracellular domain; AAV = adeno-associated virus.

**Supplementary Table 2.** Sequences of pTet-OS-mAng2 and pCR2.1-TOPO-mAng2 Plasmids\*

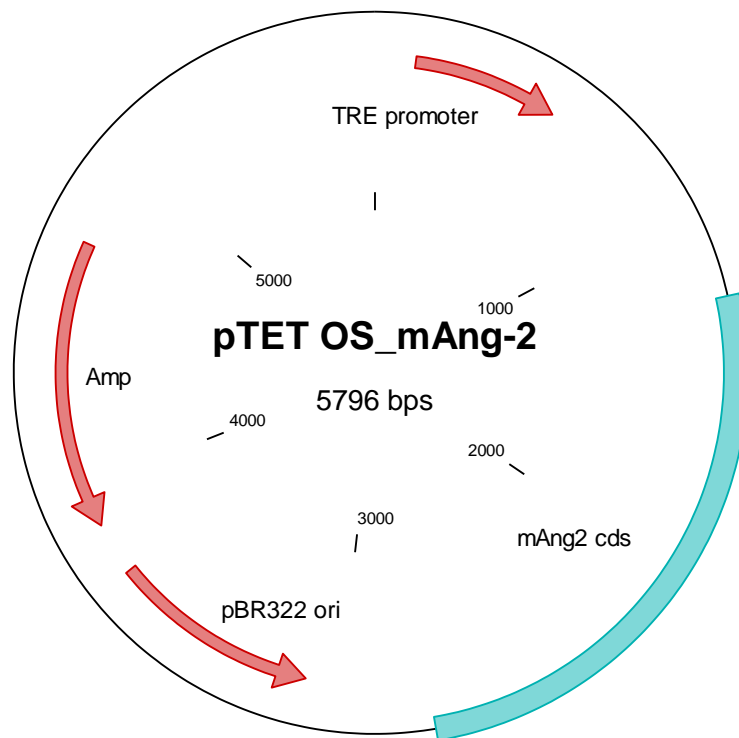

pTet\_OS\_mAng2 5796 bp DNA circular

FEATURES Location/Qualifiers

CDS 121..556  
 /gene="TRE promoter"  
 /SECDrawAs="Gene"

misc\_feature 1251..2741  
 /gene="mAng2 cds"  
 /SECDrawAs="Region"

CDS complement (3103..3722)

/gene="pBR322 ori"

/SECDrawAs="Gene"

CDS complement (3877..4737)

/gene="Amp"

/SECDrawAs="Gene"

## ORIGIN

1 gtcgacttct gaggcggaaa gaaccagctg tggaatgtgt gtcagttagg gtgtggaaag  
61 tcccaggct cccagcagg cagaagtatg caaagcctag gctttgcaa aaagctccgg  
121 atcgagtta cactcccta tcagtgatag agaaaagtga aagtcgagtt taccactccc  
181 tatcagtgat agagaaaagt gaaagtcgag ttaccactc cctatcagtg atagagaaaa  
241 gtgaaagtcg agttaccac tccctatcag tgatagagaa aagtgaaagt cgagttacc  
301 actccctatc agtgatagag aaaagtgaaa gtcgagtta cactcccta tcagtgatag  
361 agaaaagtga aagtcgagtt taccactccc tatcagtgat agagaaaagt gaaagtcgag  
421 ctcggtaccg gggtcgagta ggcgtgtacg gtgggaggcc tatataagca gagctcgttt  
481 agtgaaccgt cagatcgctt ggagacgcca tccacgctgt ttgacctcc atagaagaca  
541 ccgggaccga tccagcctcc gatcctgaga acttcagggt gagtttgggg acccttgatt  
601 gttcttctt ttcgctatt gtaaaattca tgttatatgg agggggcaaa gtttcaggg  
661 tgttgttag aatgggaaga tgtccctgt atccatgg accctcatga taatttgtt  
721 tcttcaact tctactctgt tgacaacct tgtctcctt ttttcttt tcatttctg  
781 taacttttc gtaaaactt agcttcatt tgtaacgaat tttaaattc actttgttt  
841 attgtcaga ttgtaagtac tttctaat cacttttt tcaaggcaat cagggtatat  
901 tatattgtac ttcagcacag ttttagagaa caattgtat aattaaatga taaggtagaa  
961 tatttctgca tataaattct ggctggcgtg gaaatattct tattgtaga aacaactaca  
1021 tctgtgcat catcctgcct ttctttat gttacaatg atatacactg ttgagatga  
1081 ggataaaata ctctgagtc aaaccgggcc cctctgctaa ccatgttcat gccttctct  
1141 ttttctaca gtcctgggc aacgtgctgg ttattgtgct gtctcatcat ttggcaaag  
1201 aattgtaata cgactcacta tagggcgaat tcgccctgt taacgagaga atgtggcaga

1261 tcattttcct aacttttggc tgggatcttg tcttggcctc agcctacagt aacttttagga  
1321 agagcgtgga cagcacaggc agaaggcagt accagggtcca gaacggaccc tgcagctaca  
1381 cgttctctgct gccggagacc gacagctgcc gatcttctc cagcccctac atgtccaatg  
1441 ccgtgcagag ggatgcaccc ctgactacg acgactcagt gcaaaggctg caggtgctgg  
1501 agaacattct agagaacaac acacagtggc tgatgaagct ggagaattac attcaggaca  
1561 acatgaagaa ggagatggtg gagatccaac agaatgtggt gcagaaccag acagctgtga  
1621 tgatagagat tggaaccagc ttgctgaacc agacagcagc acaaactcgg aaactgactg  
1681 atgtggaagc ccaagtacta aaccagacga caagactcga gctgcagctt ctccaacatt  
1741 ctatttctac caacaaattg gaaaagcaga ttttggatca gaccagtga ataaacaagc  
1801 taaaaataa gaacagcttc ctagaacaga aagtctgga catggagggc aagcacagcg  
1861 agcagctaca gtccatgaaa gagcagaagg acgagctcca ggtgctggg tccaagcaga  
1921 gctctgtcat tgacgagctg gagaagaagc tggtgacagc cacggtcaac aactcgtcc  
1981 ttcagaagca gcagcatgac ctaatggaga ccgtcaacag cttgctgacc atgatgtcat  
2041 cacccaactc caagagctcg gttgctatcc gtaaagaaga gcaaaccacc ttcagagact  
2101 gtgcggaaat cttaagtca ggactcacca ccagtggcat ctacacactg accttcccc  
2161 actccacaga ggagatcaag gcctactgtg acatggacgt ggggtggagga ggggtggacag  
2221 tcatccaaca ccgagaagat ggacgtgtgg acttccagag gacgtggaaa gaatacaaag  
2281 agggcttcgg gagccctctg ggagagtact ggctgggcaa cgagtttgc tcccagctga  
2341 ccggtcagca ccgctacgtg cftaagatcc agctgaagga ctgggaaggc aacgaggcgc  
2401 attcgtgta tgatcactc tacctcgtg gtgaagagtc caactacagg attcacctta  
2461 caggactcac ggggaccgcg ggcaaaataa gtagcatcag ccaaccagga agtgatttta  
2521 gcacaaagga ttcggacaat gacaaatgca tctgcaagtg ttcccagatg ctctcaggag  
2581 gctggtggtt tgacgcatgt ggtcctcca acttgaatgg acagtactac ccacaaaaac  
2641 agaatacaaa taagttaac ggtatcaagt ggtactactg gaaggggtcc ggctactcgc  
2701 tcaaggccac aaccatgatg atccggccag cagatttcta aatgcctgcc gttaacaag  
2761 gcgaattcgg atccagatct tattaagca gaactgttt attgcagctt ataatggtta  
2821 caaataaagc aatagcatca caaatttca aaataaagca ttttttca tgcattctag  
2881 ttgtggttg tccaaactca tcaatgtatc ttatcatgct tggctgactc tagactcttc

2941 cgcttctcgc ctactgact cgctgcgctc ggtcgttcgg ctgcggcgag cggtatcagc  
3001 tctactcaaag gcggaatac gggtatccac agaatcaggg gataacgcag gaaagaacat  
3061 gtgagcaaaa ggccagcaaa aggccaggaa ccgtaaaaag gccgcgttgc tggcgtttt  
3121 ccataggctc cgccccctg acgagcatca caaaaatcga cgctcaagtc agaggtggcg  
3181 aaacccgaca ggactataaa gataccaggc gttccccct ggaagctccc tcgtgcgctc  
3241 tcctgttccg accctgccg ttaccggata cctgtccgcc tttctccct cggaagcgt  
3301 ggcgcttct caatgctcac gctgtaggta tctcagttcg gtgtaggtcg ttcgctcaa  
3361 gctgggctgt gtgcacgaac cccccgttca gcccgaccgc tgcgccttat ccgtaacta  
3421 tcgtcttgag tccaacccgg taagacacga cttatcgcca ctggcagcag cactggtaa  
3481 caggattagc agagcgaggt atgtaggcgg tgctacagag ttctgaagt ggtggcctaa  
3541 ctacggctac actagaagga cagtattgg tatctgcgct ctgctgaagc cagttacct  
3601 cggaaaaaga gttgtagct ctgatccgg caaacaacc accgctggta gcggtggtt  
3661 tttgtttgc aagcagcaga ttacgcgcag aaaaaagga tctcaagaag atccttcat  
3721 ctttctacg gggctgacg ctcagtgga cgaaaactca cgtaaggga tttgtgcat  
3781 gagattatca aaaaggatct tcacctagat cttttaaataaaaaatgaa gttttaaatac  
3841 aatctaaagt atatatgagt aaactggtc tgacagttac caatgcttaa tcagtgggc  
3901 acctatctca gcgatctgtc ttttcgttc atccatagtt gcctgactcc ccgctgtgta  
3961 gataactacg atacgggagg gcttaccatc tggccccagt gctgcaatga taccgcgaga  
4021 cccacgctca ccggctccag atttatcagc aataaaccag ccagccggaa gggccgagcg  
4081 cagaagtggc cctgcaactt tatccgcctc catccagtct attaattgtt gccgggaagc  
4141 tagagtaagt agttcgccag ttaatagttt gcgcaacgtt gttgccattg ctacagcat  
4201 cgtggtgtca cgctcgtcgt ttggtatggc ttattcagc tccggtccc aacgatcaag  
4261 gcgagttaca tgatcccca tgtgtgcaa aaaagcgggt agtccttcg gtctccgat  
4321 cgttgcaga agtaagtgg ccgcagttt atcactcatg gttatggcag cactgcataa  
4381 ttctctact gcatgcat ccgtaagatg ctttctgtg actggtgagt actcaaccaa  
4441 gtcattctga gaatagtga tgccggcacc gagttgctct tgccccgct caatacggga  
4501 taataccgcg ccacatagca gaactttaa agtgcctatc attggaaaac gttctcggg  
4561 gcgaaaactc tcaaggatct taccgctgt gagatccagt tcgatgtaac cactcgtgc

4621 acccaactga tcttcagcat cttttacttt caccagcgtt tctgggtgag caaaaacagg  
4681 aaggcaaaaat gccgcaaaaa agggaataag ggcgacacgg aatggtgaa tactcatact  
4741 cttcttttt caatattatt gaagcattta tcagggttat tgtctcatga gcgatacat  
4801 attgaaatgt atttagaaaa ataaacaaat aggggttccg cgcacattc cccgaaaagt  
4861 gccacctgac gtctaagaaa ccattattat catgacatta acctataaaa ataggcgtat  
4921 cacgaggccc ctttcgtctc gcgcgtttcg gtgatgacgg tgaaaacctc tgacacatgc  
4981 agtcccggg gacggtcaca gcttgtctgt aagcggatgc cgggagcaga caagcccgtc  
5041 agggcgcgtc agcgggtgtt ggcgggtgtc ggggctggct taactatgcg gcatcagagc  
5101 agattgtact gagagtgcac catatgcggt gtgaaatacc gcacagatgc gtaaggagaa  
5161 aataccgcat caggaaattg taaacgttaa tttttgtta aaattcgcgt taaattttg  
5221 ttaaatacgc tcattttta accaataggc cgaaatcggc aaaatccctt ataaatcaaa  
5281 agaataagacc gagatagggt tgagtgtgt tccagtttg aacaagagtc cactatataa  
5341 gaacgtggac tccaacgtca aaggcgaaa aaccgtctat cagggcgatg gccactacg  
5401 tgaacatca ccctaatcaa gtttttggg gtcgaggtgc cgtaaagcac taaatcggaa  
5461 ccctaaaggg agccccgat ttagagcttg acggggaaag ccggcgaacg tggcgagaaa  
5521 ggaaggaag aaagcgaag gagcgggagc tagggcgctg gcaagttag cggtcacgct  
5581 gcgagtaacc accacacccg ccgagcttaa tgcgccccta cagggcgctg cgcgccattc  
5641 gccattcagg ctacgcaact gttgggaagg gcatcgggtg cgggcctctt cgctattacg  
5701 ccagctggcg aaggggggat gtgctgcaag gcgattaagt tggtaacgc cagggtttc  
5761 ccagtcacga cgttgtaaaa cgacggccag tgaatt

//

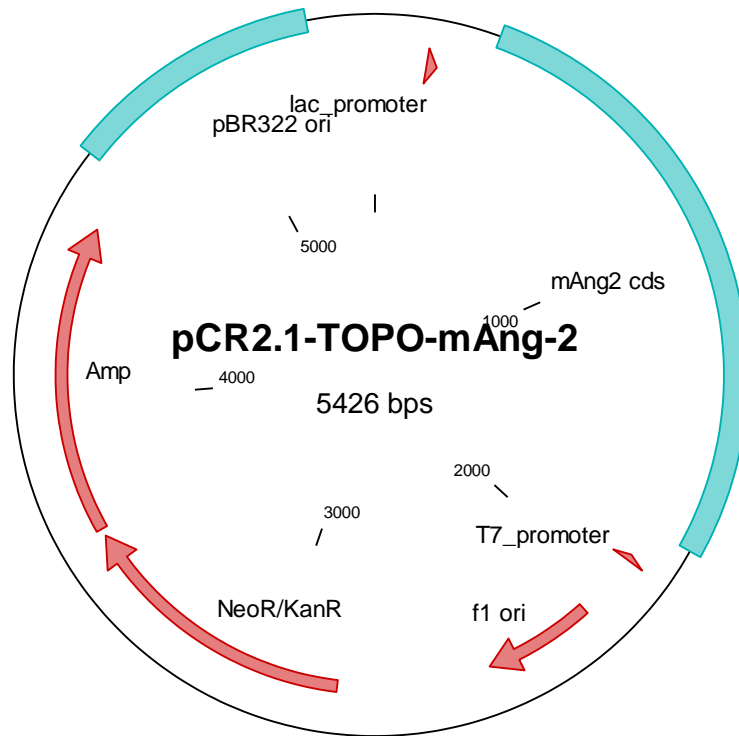

pCR2.1-TOPO-mAng2 5426 bp DNA circular

FEATURES Location/Qualifiers

CDS 143..172  
 /gene="lac\_promoter"  
 /SECDrawAs="Gene"

misc\_feature 307..1797  
 /gene="mAng2 cds"  
 /SECDrawAs="Region"

CDS complement (1884..1902)  
 /gene="T7\_promoter"

/SECDrawAs="Gene"

CDS 2083..2389

/gene="f1 ori"

/SECDrawAs="Gene"

CDS 2817..3605

/gene="NeoR/KanR"

/SECDrawAs="Gene"

CDS 3626..4486

/gene="Amp"

/SECDrawAs="Gene"

misc\_feature 4641..5260

/gene="pBR322 ori"

/SECDrawAs="Region"

## ORIGIN

1 agcgcccaat acgcaaaccg cctctccccg cgcgttgcc gattcattaa tgcagctggc  
61 acgacagggt tcccgactgg aaagcgggca gtgagcgcaa cgcaattaat gtgagttagc  
121 tcaactatta ggcaccccag gctttacact ttatgctcc ggctcgtatg ttgtgtggaa  
181 ttgtgagcgg ataacaattt cacacaggaa acagctatga ccatgattac gccaagcttg  
241 gtaccgagct cggatccact agtaacggcc gccagtgtgc tggattcgc ccttgtaac  
301 gagagaatgt ggagatcat tttctaact ttggctggg atctgtctt ggcctcagcc  
361 tacagtaact ttaggaagag cgtggacagc acaggcagaa ggcagtacca ggtccagaac  
421 ggaccctgca gctacacggt cctgctgccg gagaccgaca gctgccgatc ttctccagc  
481 ccctacatgt ccaatgccgt gcagagggat gcaccctcg actacgacga ctcagtgcaa  
541 aggctgcagg tgctggagaa cattctagag aacaacacac agtggctgat gaagctggag  
601 aattacattc aggacaacat gaagaaggag atggtggaga tccaacagaa tgtggtgcag  
661 aaccagacag ctgtgatgat agagattgga accagctgc tgaaccagac agcagcacia  
721 actcggaaac tgactgatgt ggaagcccaa gtactaaacc agacgacaag actcagagctg  
781 cagcttctcc aacattctat ttaccacaa aaattgaaa agcagatttt ggatcagacc



841 agtgaataa acaagctaca aaataagaac agcttcctag aacagaaagt tctggacatg  
901 gagggcaagc acagcgagca gctacagtcc atgaaagagc agaaggacga gctccaggtg  
961 ctggtgtcca agcagagctc tgtcattgac gagctggaga agaagctggt gacagccacg  
1021 gtcaacaact cgctccttca gaagcagcag catgacctaa tggagaccgt caacagcttg  
1081 ctgacatga tgtatcacc caactccaag agctcgggtg ctatccgtaa agaagagcaa  
1141 accaccttca gagactgtgc ggaaatctt aagtcaggac tcaccaccag tggcatctac  
1201 aactgacct tcccaactc cacagaggag atcaaggcct actgtgacat ggacgtgggt  
1261 ggaggagggt ggacagtcat ccaacaccga gaagatggca gtgtggactt ccagaggacg  
1321 tggaaagaat acaaagaggg cttcgggagc cctctgggag agtactggct gggcaacgag  
1381 tttgtctccc agctgaccgg tcagcaccgc tacgtgctta agatccagct gaaggactgg  
1441 gaaggcaacg aggcgcattc gctgtatgat cacttctacc tcgctgggga agagtccaac  
1501 tacaggattc accttacagg actcacgggg accgcgggca aaataagtag catcagccaa  
1561 ccaggaagtg attttagcac aaaggattcg gacaatgaca aatgcatctg caagtgtcc  
1621 cagatgctct caggaggctg gtggtttgac gcatgtggtc ctccaactt gaatggacag  
1681 tactaccac aaaaacagaa tacaataag ttaacggta tcaagtggta ctactggaag  
1741 gggtcggct actcgtcaa ggccacaacc atgatgatcc ggccagcaga tttctaaatg  
1801 cctgccgta acaaagggcg aattctgcag atatccatca cactggcggc cgctcgagca  
1861 tgcatctaga gggcccaatt cgccctatag tgagtogtat tacaattcac tggccgctg  
1921 ttacaacgt cgtgactggg aaaaccctgg cgttaccaa ctaatcgcc ttgcagcaca  
1981 tcccccttc gccagctggc gtaatagcga agaggccgc accgatcgcc ctccaaca  
2041 gttgcgcagc ctgaatggcg aatggacgcg ccctgtagcg ggcattaag cgcggcgggt  
2101 gtggtggta cgcgcagcgt gaccgctaca ctgcccagcg ccctagcgcc cgctccttc  
2161 gctttctcc ctctcttct cgccacgttc gccggcttc cccgtcaagc tctaaatcg  
2221 gggctccct taggggtccg atttagtct ttacggcacc tcgaccccaa aaaactgat  
2281 tagggtgatg gttcacgtag tgggcatcg ccctgataga cggttttcg cccttgacg  
2341 ttgagtgca cgttctttaa tagtggactc ttgtccaaa ctggaacaac actcaacct  
2401 atctcggct atctcttga ttataaggg atttgcccga tttcggccta ttggttaaaa  
2461 aatgagctga ttaacaaat tcaggggcga agggctgcta aaggaagcgg aacacgtaga

2521 aagccagtcc gcagaaacgg tgtgacccc g gatgaatgt cagctactgg gctatctgga  
2581 caagggaaaa cgcaagcgca aagagaaagc aggtagcttg cagtgggctt acatggcgat  
2641 agctagactg ggcggtttta tggacagcaa gcgaaccgga attgccagct ggggcgccct  
2701 ctggaaggt tgggaagccc tgcaaagtaa actggatggc tttctgccc ccaaggatct  
2761 gatggcgag gggatcaaga tctgatcaag agacaggatg aggatcggtt cgc atgattg  
2821 aacaagatgg attgcacgca ggttctccgg ccgctgggt ggagaggcta ttcggctatg  
2881 actgggcaca acagacaatc ggctgctctg atgccgccgt gttccggctg tcagcgcagg  
2941 ggcgcccgt tctttgtc aagaccgacc tgtccgggtc cctgaatgaa ctgcaggacg  
3001 aggcagcgcg gctatctgg ctggccacga cgggcttcc ttgcgcagct gtgctcgacg  
3061 ttgtactga agcgggaagg gactggctgc tattgggca agtgccgggg caggatctcc  
3121 tgc atccca cctgctct gccgagaaag tatccatcat ggctgatgca atgcggcggc  
3181 tgcatacgt tgatccggct acctgccat tcgaccacca agcgaacat cgc atcgagc  
3241 gagcacgtac tcggatggaa gccggtcttg tcgatcagga tgatctggac gaagagcatc  
3301 aggggctcgc gccagccgaa ctgttcgcca ggctcaaggc gcgcatgcc gacggcgagg  
3361 atctcgtctg gacctggc gatgctctg tgccgaatat catggtggaa aatggccgt  
3421 tttctggatt catcgactgt ggccggctgg gtgtggcgga ccgctatcag gacatagcgt  
3481 tggctacccg tgatattgct gaagagcttg gcggcgaatg ggctgaccgc ttctctgctc  
3541 ttacggat cgccgctccc gattcgcagc gcatgcctt ctatgcctt ctgacgagt  
3601 tttctgaat tgaaaaagga agagtatgag tattcaacat ttccgtgctg ccctattcc  
3661 cttttgcg gcatttgc ttctgttt tgctaccca gaaacgctgg tgaagtaaa  
3721 agatgctgaa gatcagttg gtgcacgagt ggttacatc gaactggatc tcaacagcgg  
3781 taagatcct gagagtttc gcccgaaga acgtttcca atgatgagca ctttaaagt  
3841 tctgctatgt ggcgctgat tatcccgtat tgacgccggg caagagcaac tcggtcgccg  
3901 catacactat tctcagaatg acttggttga gtactacca gtcacagaaa agcatcttac  
3961 ggatggcatg acagtaagag aattatgcag tgctgccata accatgagtg ataactgac  
4021 ggccaactta cttctgacaa c gatcggagg accgaaggag ctaaccgctt tttgacaaa  
4081 catgggggat catgtaactc gcctgatcg ttgggaaccg gagctgaatg aagccatacc  
4141 aaacgacgag cgtgacacca c gatgcctgt agcaatggca acaacgttg gcaaactatt

4201 aactggcgaa ctacttactc tagcttcccg gcaacaatta atagactgga tggaggcgga  
4261 taaagttgca ggaccacttc tgcgctcggc ccttccggct ggctggttta ttgctgataa  
4321 atctggagcc ggtgagcgtg ggtctcgcgg tatcattgca gactggggc cagatggtaa  
4381 gccctcccgt atcgtagtta tctacacgac ggggagtcag gcaactatgg atgaacgaaa  
4441 tagacagatc gctgagatag gtgcctcact gattaagcat tggtaactgt cagaccaagt  
4501 ttactcatat atactttaga ttgatttaa acttcatttt taatttaaaa ggatctaggt  
4561 gaagatcctt ttgataatc tcatgaccaa aatcccttaa cgtgagtttt cgttccactg  
4621 agcgtcagac cccgtagaaa agatcaaagg atcttcttga gatcctttt ttctgcgcgt  
4681 aatctgctgc ttgcaaaca aaaaaccacc gctaccagcg gtggtttgtt tgccggatca  
4741 agagctacca actcttttc cgaaggaac tggcttcagc agagcgcaga taccaaatac  
4801 tgttcttcta gtgtagccgt agttaggcca ccaactcaag aactctgtag caccgcctac  
4861 atacctogct ctgctaatac tgttaccagt ggctgctgcc agtggcgata agtcgtgtct  
4921 taccgggttg gactcaagac gatagttacc ggataaggcg cagcggtcgg gctgaacggg  
4981 gggttcgtgc acacagccca gcttggagcg aacgacctac accgaactga gatacctaca  
5041 gcgtgagcta tgagaaagcg ccacgcttc cgaagggaga aaggcggaca ggtatccggt  
5101 aagcggcagg gtcggaacag gagagcgcac gagggagctt ccagggggaa acgcctggta  
5161 tctttatagt cctgtcgggt ttcgccacct ctgacttgag cgctgatttt tgtgatgctc  
5221 gtcagggggg cggagcctat ggaaaaacgc cagcaacgcg gccttttac ggttctggc  
5281 ctttgctgg cttttgctc acatgttctt tctgctgta tcccctgatt ctgtggataa  
5341 ccgtattacc gccttgagt gagctgatac cgctcggcgc agccgaacga ccgagcgcag  
5401 cgagtcagtg agcgaggaag cggaag

\* TRE = tetracycline response element; p = plasmid; TET\_OS\_Ang2 = mouse tetracycline inducible angiopoietin-2; cds = coding sequence; Amp = ampicillin; bps = base pairs; pBR322 ori = replication origin from pBR322; pCR2.1-TOPO = name of the plasmid from Invitrogen; NeoR/KanR = neomycin resistance cassette / kanamycin resistance cassette; T7 promoter = promoter sequence derived from T7 bacteriophage; mAng2 = mouse angiopoietin-2; lac-promoter = promoter from  $\beta$ -galactosidase gene; f1 ori = replication origin, derived from f1 filamentous bacteriophage.

**Supplementary Table 3.** Sequences of mTie2(ECD)-VSV-G and mTie2(ECD)-FLAG Plasmids\*

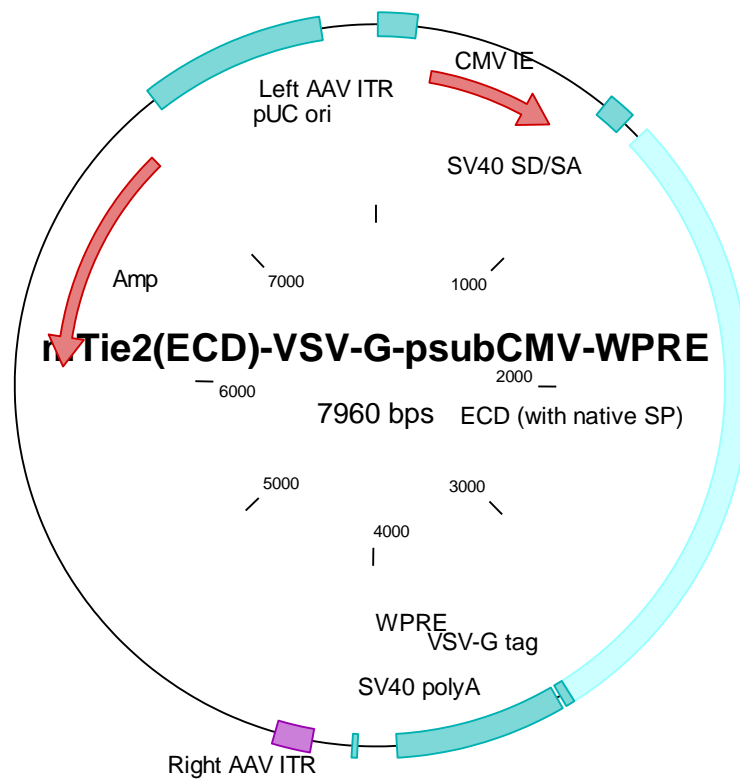

mTie2(ECD)-VSV-G 7960 bp DNA circular

FEATURES Location/Qualifiers

misc\_feature 7..144

/gene="Left AAV ITR"

/SECDrawAs="Region"

CDS 222..744

/gene="CMV IE"

/product="pCMV-beta(Clontech); 27-549"

/SECDrawAs="Gene"  
 misc\_feature 715..721  
 /gene="TATA-box"  
 /SECDrawAs="Info only"  
 misc\_feature 867..963  
 /gene="SV40 SD/SA"  
 /product="Intron (SV40 splice donor/splice acceptor)"  
 /SECDrawAs="Region"  
 misc\_feature 1031..3268  
 /gene="ECD (with native SP)"  
 /SECDrawAs="Region"  
 misc\_feature 3269..3301  
 /gene="VSV-G tag"  
 /SECDrawAs="Region"  
 misc\_feature 3315..3906  
 /gene="WPRE"  
 /product="J04514; 1093-1684"  
 /SECDrawAs="Region"  
 misc\_feature 4044..4063  
 /gene="SV40 polyA"  
 /SECDrawAs="Region"  
 misc\_feature complement (4205..4338)  
 /gene="Right AAV ITR"  
 /SECDrawAs="Region"  
 CDS complement (6046..6976)  
 /gene="Amp"  
 /SECDrawAs="Gene"  
 misc\_feature complement (7124..7767)  
 /gene="pUC ori"  
 /SECDrawAs="Region"

ORIGIN

1 cattaatgca gcagctgcg gctcgctcgc tcaactgagggc cgcccgggca aagcccgggc  
61 gtcggggcgac ctttggtcgc ccggcctcag tgagcgagcg agcgcgaga gaggagtg  
121 ccaactccat cactaggggt tcctgtagt taatgattaa cccgcatgc tactatcta  
181 cgtagccatg ctctagaatt cgagcttgca tgctgcagg tcgttacata acttacgga  
241 aatggcccgc ctggctgacc gccaacgac cccgcccac tgacgtcaat aatgacgat  
301 gttccatag taacgccaat agggacttc cattgacgtc aatgggtgga gtattacgg  
361 taaactgcc acttggcagt acatcaagt tatcatatgc caagtagcc ccctattgac  
421 gtcaatgacg gtaaattggc cgctggcat tatgcccagt acatgacct atgggactt  
481 cctactggc agtacatcta cgtattagtc atcgctatta ccatgggat gcggtttg  
541 cagtacatca atgggctgg atagcggtt gactcacggg gattccaag tctccacc  
601 atgacgtca atgggagtt gtttggcac caaatcaac gggacttcc aaaatgctg  
661 aacaactccg cccattgac gcaaatggc gtaggcgtg tacggtgga ggtctatata  
721 agcagagctc gtttagtgaa ccgtcagatc gcctggagac gccatccacg ctgtttgac  
781 ctccatagaa gacaccgga ccgatccagc ctccggactc tagaggatcc ggtactcag  
841 gaactgaaa accagaaagt taactgtaa gtttagtctt tttgtctt attcaggtc  
901 ccgatccg tggtgtgca aatcaaaga ctgctcctca tggtatgtg ctttactc  
961 taggcctgta cggaagtgt acttctgctc taaaagctc ggaattgtac ccgcgccg  
1021 tagcgccacg atggactct tagccggtt agttctctgt ggagtcagct tgctctta  
1081 tggagtagta gaaggcgca tggactgat ctgatcaat tcctacctc ttgtgtgta  
1141 tgccgaaaca tcctcacct gcattgcctc tgggtggcac cccatgagc ccatccat  
1201 aggaaggac ttgaagcct taatgaacca gcaccaagat cactggagg ttactcaaga  
1261 tgtgaccaga gaatggcgca aaaaagttg ttggaagaga gaaaaggcca gtaagattaa  
1321 tgggtctat ttctgtaag gtcgagttc aggacaggct ataaggatac ggaccatgaa  
1381 gatgctcaa caagatcct tctacctgc tacttaact atgaccgtg acaggggaga  
1441 taatgtgaa atatttca aaaagtggt aattaaaga gaagatgag tgattaca  
1501 aatggctcc tcatccact cagtgcccc gcatgaagta cctgatatt tagaagtca  
1561 ctgcccgc gctcagccc aggatgctg tgtgtactc gccaggta taggaggaa  
1621 cctgttacc tcagcttca ccaggctgat tttcggaga tgtgaagctc agaagtggg  
1681 gccgactgt agccgtctt gtactactg caagaacaat ggagtctgc atgaagatac  
1741 cggggaatgc atttgcctc ctgggtttat ggggagaaca tgtgagaaag ctgtgagcc  
1801 gcacacattt ggcaggacct gtaaagaag gtgtagtgga ccagaaggat gcaagtcta

1861 tgtgttctgt ctcccagacc cttacgggtg ttctgtgcc acaggctgga gggggttgca  
1921 gtgcaatgaa gcatgccc atggttacta cggaccagac tgtaagctca ggtgccactg  
1981 taccaatgaa gagatatgtg atcggttcca aggatgcctc tgctctcaag gatggcaagg  
2041 gctgcagtgt gagaaagaag gcaggccaag gatgactcca cagatagagg attgcccaga  
2101 tcacattgaa gtaaacagtg gaaaatttaa ccccatctgc aaagcctctg ggtggccact  
2161 acctactagt gaagaaatga ccctagttaa gccagatggg acagtgctcc aaccaaata  
2221 ctcaactat acagatcgtt tctcagtggc catattcact gtcaaccgag tcttacctcc  
2281 tgactcagga gtctgggtct gcagtgtgaa cacagtggct gggatgggtg aaaagcctt  
2341 caacatttcc gtcaaagttc ttccagagcc cctgcacgcc ccaaagtga ttgacactgg  
2401 acataacttt gctatcatca atacagctc tgagccttac tttgggatg gacctatca  
2461 atccaagaag ctttctata aacctgtcaa tcaggcctgg aaatacattg aagtgcagaa  
2521 tgagatttc acttcaact acttgagacc gcggactgac tacgagctgt gtgtgcagct  
2581 ggcccgtcct ggagagggtg gagaaggga tctgggcct gtgagacgat ttacaacagc  
2641 gtctatcggg ctcctctc caagaggctc cagtctctg ccaaaaagcc agacagctct  
2701 aaattgact tggcaaccga tatttcaaaa ctcagaagat gaatttatg tgaagtcca  
2761 gaggcgatcc ctgcaaaaa caagtatca gcagaacatc aaagtgcctg ggaacctgac  
2821 ctgggtgcta ctgagcaact tagtccccag ggagcagtac acagtccgag ctgagtcaa  
2881 caccaaggcg cagggggagt ggagtgaaga actcagggcc tggaccctta gtgacattct  
2941 cctcctcaa ccagaaaaca tcaagatctc caacatcact gactccacag ctatggttc  
3001 ttgacaata gtggatggct attcgattc ttccatcatc atccggata aggttcaggg  
3061 caaaaatgaa gaccagcaca ttgatgtgaa gatcaagaat gctaccgta ctcagtacca  
3121 gctcaagggc ctgagccag agactacata ccatgtggat attttgctg agaacaacat  
3181 aggatcaagc aaccagcct ttctcatga actgaggacg ctccacatt cccagcctc  
3241 tgcagacctc ggagggggaa agatgctata caccgacatc gagatgaaca ggctgggaaa  
3301 gtagacgcgt gcataatcaa cctctggatt acaaaattg tgaaagattg actggtattc  
3361 ttaactatgt tgctccttt acgctatgtg gatacgtgc ttaaatgcct ttgtatcatg  
3421 ctattgctc ccgatggct tcattttct cctcctgta taaatcctgg ttgctgtctc  
3481 ttatgagga gttgtggccc gttgtcaggc aacgtggcgt ggtgtgact gtgttgctg  
3541 acgcaacccc cactggttg ggcatgcca ccacctgca gctccttcc gggacttccg  
3601 cttccccct ccctattgcc acggcggaac tcatgccgc ctgccttcc cgctgctgga  
3661 caggggctcg gctgtgggc actgacaatt ccgtgggtt gtcggggaag ctgacgtcct

3721 ttccatggct gctcgcctgt gttgccacct ggattctgcg cgggacgtcc ttctgctaag  
3781 tcccttcggc cctcaatcca gcggaccttc ctccccggg cctgctgccg gctctgcggc  
3841 ctctccgcg tcttcgcctt cgccctcaga cgagtcggat ctcccttgg gccgcctccc  
3901 cgctgatcg cggccgcggg gatccagaca tgataagata cattgatgag ttggacaaa  
3961 ccacaactag aatgcagtga aaaaaatgct ttatttga aatttggat gctattgctt  
4021 tatttgaac cattataagc tgcaataaac aagttaacaa caacaattgc attcattta  
4081 tgttcaggt tcagggggag gttggtggagg tttttcggg tcctctagag tcgacctgca  
4141 ggcatgcaag ctctagagca tggctacgta gataagtagc atggcgggtt aatcattaac  
4201 tacaaggaac ccctagtgat ggagttggcc actccctctc tgccgctcg ctgctcact  
4261 gaggccgggc gaccaaaggc cccccgacgc cggggcttg cccggggcggc ctgctgagc  
4321 gagcgagcgc gccagctggc gtaatagcga agaggccgc accgatcgcc ctcccaaca  
4381 gttgcgagc ctgaatggcg aatggaattc cagacgattg agcgtcaaaa ttaggtatt  
4441 tccatgagcg ttttctgt tgcaatggct ggcggaata ttgtctgga tattaccagc  
4501 aaggccgata gttgagttc ttctactcag gcaagtgatg ttattactaa tcaaagaagt  
4561 attgcgacaa cggtaattt gcgtgatgga cagactctt tactcgggtg ctcactgat  
4621 tataaaaaca ctctcagga ttctggcgta ccgttctgt ctaaaatccc ttaatcggc  
4681 ctctgttta gctcccctc tgattctaac gaggaaagca cgttatacgt gctcgtcaaa  
4741 gcaaccatag tacgcgccct gtagcggcgc attaagcgcg gcgggtgtgg tggttacggc  
4801 cagcgtgacc gctacacttg ccagcgccct agcggccgct ctttcgctt tctccctc  
4861 ctttctgcc acgttcgccc gctttccccg tcaagctcta aatcgggggc tcccttagg  
4921 gttccgattt agtgctttac ggcacctcga ccccaaaaaa cttgattagg gtgatggtc  
4981 acgtagtggg ccatcgccct gatagacggt ttttcgccct ttgacgttg agtccacgtt  
5041 cttaatagt ggactctgt tccaaactgg aacaacactc aaccctatct cggctattc  
5101 tttgattta taagggattt tgccgattc ggcctattg ttaaaaaatg agctgattta  
5161 acaaaaattt aacgcgaatt ttaacaaaat attaacgtt acaattaaa tatttgctta  
5221 tacaatcttc ctgttttgg ggcttttctg attatcaacc ggggtacata tgattgacat  
5281 gctagtttta cgattaccgt tcatcgattc tctgtttgc tccagactct caggcaatga  
5341 cctgatagcc tttgtagaga cctctcaaaa atagctacc tctccggcat gaattatca  
5401 gctagaacgg tgaatatca tattgatggt gattgactg tctccggcct ttctacccg  
5461 ttgaaactt tacctacaca ttactcaggc attgcattta aaatatatga gggttctaaa  
5521 aattttatc ctgctgtga aataaaggct tctcccga aagtattaca gggtcataat



5581 gttttggta caaccgattt agctttatgc tctgaggctt tattgcttaa ttttgcta  
5641 tctttgcctt gcctgtatga tttattggat gttggaattc ctgatgcggt atttctcct  
5701 tacgcatctg tgcggtattt cacaccgcat atggtgact ctcagtacaa tctgctctga  
5761 tgccgcatag ttaagccagc cccgacaccc gccaacaccc gctgacgcg cctgacgggc  
5821 ttgtctgctc ccggcatccg cttacagaca agctgtgacc gtctccggga gctgcatgtg  
5881 tcagaggttt tcaccgtcat caccgaaacg cgcgagacga aagggcctcg tgatagcct  
5941 attttatag gttaatgca tgataataat ggtttctag acgtcagggtg gcacttttcg  
6001 gggaaatgtg cgcggaaccc ctattgtttt attttctaa atacattcaa atatgtatcc  
6061 gctcatgaga caataaccct gataaatgct tcaataatat tgaaaaagga agagtatgag  
6121 tattcaacat ttccgtgctg cccttattcc ctttttgcg gcattttgcc ttctgtttt  
6181 tgctcaccca gaaacgctgg tgaaagtaaa agatgctgaa gatcagttgg gtcacgagt  
6241 gggttacatc gaactggatc tcaacagcgg taagatcctt gagagtttc gccccgaaga  
6301 acgtttcca atgatgagca cttttaaagt tctgctatgt ggcgcggtat tatcccgtat  
6361 tgacgccggg caagagcaac tcggtcgccg catacactat tctcagaatg acttggtga  
6421 gtactacca gtcacagaaa agcatcttac ggatggcatg acagtaagag aattatgcag  
6481 tgctgccata accatgagtg ataactgctg ggccaactta cttctgacaa cgatcggagg  
6541 accgaaggag ctaaccgctt tttgcacaa catgggggat catgtaactc gccttgatcg  
6601 ttgggaaccg gagctgaatg aagccatacc aaacgacgag cgtgacacca cgatgcctgt  
6661 agcaatggca acaacgttg ccaaactatt aactggcgaa ctactactc tagcttccc  
6721 gcaacaatta atagactgga tggaggcgga taaagttgca ggaccactc tgcgctcggc  
6781 ccttccggct ggctggtta ttgctgataa atctggagcc ggtgagcgtg ggtctcggc  
6841 tatcattgca gcactggggc cagatggtaa gccctcccgt atcgtagtta tctacacgac  
6901 ggggagtcag gcaactatgg atgaacgaaa tagacagatc gctgagatag gtgcctcact  
6961 gattaagcat tgtaactgt cagaccaagt ttactcatat atactttaga ttgatttaa  
7021 acttcattt taatttaaaa ggatctaggt gaagatcctt tttgataatc tcatgaccaa  
7081 aatcccttaa cgtgagttt cgttccactg agcgtcagac cccgtagaaa agatcaaagg  
7141 atcttctga gatcctttt ttctgcgctg aatctgctgc ttgcaaaaa aaaaaccacc  
7201 gctaccagcg gtggtttgt tgccgatca agagctacca actcttttc cgaaggtaac  
7261 tggcttcagc agagcgcaga taccaaatac tgccttcta gttagccgt agttaggcca  
7321 ccaactcaag aactctgtag caccgcctac atacctcgt ctgctaatac tgttaccagt  
7381 ggctgctgcc agtggcgata agtcgtgtct taccgggtg gactcaagac gatagttacc

7441 ggataaggcg cagcggcgg gctgaacggg gggctcgtgc acacagcca gcttggagcg  
7501 aacgacctac accgaactga gatacctaca gcgtgagcta tgagaaagcg ccacgcttc  
7561 cgaagggaga aaggcggaca ggtatccggt aagcggcagg gtcggaacag gagagcgcac  
7621 gagggagctt ccagggggaa acgcctgga tctttatagt cctgtcgggt ttcgccacct  
7681 ctgacttgag cgtcgattt tgtgatgctc gtcagggggg cggagcctat ggaaaaacgc  
7741 cagcaacgcg gccttttac ggttcctggc ctttgctgg cctttgctc acatgttctt  
7801 tcctcgfta tcccctgatt ctgtggataa ccgattacc gccttgagt gagctgatac  
7861 cgctcgccgc agccgaacga ccgagcgcag cgagtcagtg agcgaggaag cggaagagcg  
7921 cccaatacgc aaaccgcctc tccccgcgcg ttggccgatt

//

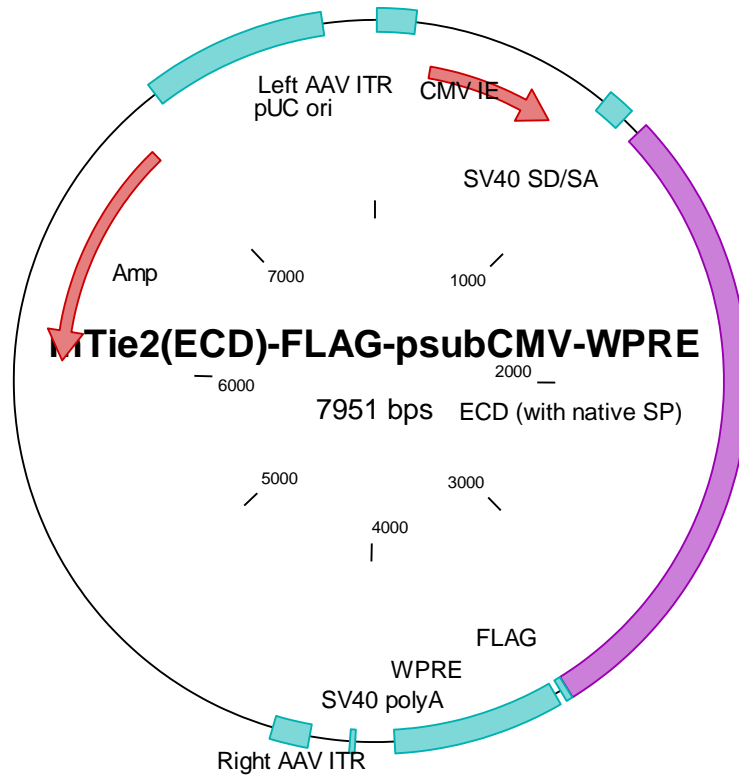

mTie2(ECD)-FLAG 7951 bp DNA circular

FEATURES Location/Qualifiers

misc\_feature 7..144

/gene="Left AAV ITR"

/SECDrawAs="Region"

CDS 222..744

/gene="CMV IE"VSV-

/product="pCMV-beta(Clontech); 27-549"

/SECDrawAs="Gene"

misc\_feature 715..721

/gene="TATA-box"  
/SECDrawAs="Info only"

misc\_feature 867..963  
/gene="SV40 SD/SA"  
/product="Intron (SV40 splice donor/splice acceptor)"  
/SECDrawAs="Region"

misc\_feature 1031..3268  
/gene="ECD (with native SP)"  
/SECDrawAs="Region"

misc\_feature 3269..3292  
/gene="FLAG"  
/SECDrawAs="Region"

misc\_feature 3315..3906  
/gene="WPRE"  
/product="J04514; 1093-1684"  
/SECDrawAs="Region"

misc\_feature 4044..4063  
/gene="SV40 polyA"  
/SECDrawAs="Region"

misc\_feature complement (4205..4338)  
/gene="Right AAV ITR"  
/SECDrawAs="Region"

CDS complement (6046..6976)  
/gene="Amp"  
/SECDrawAs="Gene"

misc\_feature complement (7124..7767)  
/gene="pUC ori"  
/SECDrawAs="Region"

## ORIGIN

1 cattaatgca gcagctgcg cctcgctcgc tcaactgaggc cgccccgggca aagccccggc  
61 gtcggggcgac ctttggtcgc ccggcctcag tgagcgagcg agcgcgcaga gagggagtg  
121 ccaactccat cactaggggt tcctttagt taatgattaa cccgcatgc tacttatcta  
181 cgtagccatg ctctagaatt cgagcttgca tgctgcagg tcgttacata acttacggta  
241 aatgccccgc ctggctgacc gcccaacgac ccccgccat tgacgtcaat aatgacgtat  
301 gttccatag taacgccaat agggacttc cattgacgtc aatgggtgga gtattacgg  
361 taaactgcc acttggcagt acatcaagt tatcatatgc caagtagcc ccctattgac  
421 gtcaatgacg gtaaattggc cgcctggcat tatgcccagt acatgacctt atgggacttt  
481 cctactggc agtacatcta cgtattagtc atcgtatta ccatggtgat gcggtttgg  
541 cagtacatca atgggctgg atagcggtt gactcacggg gattccaag tctccacccc  
601 atgacgtca atgggagtt gtttggcac caaatcaac gggacttcc aaaatgctg  
661 aacaactccg cccattgac gcaaatggc gtaggcgtg tacggtggga ggtctatata  
721 agcagagctc gtttagtgaa ccgtcagatc gctggagac gccatccacg ctgtttgac  
781 ctccatagaa gacaccggga ccgatccagc ctccggactc tagaggatcc ggtactcgag  
841 gaactgaaaa accagaaagt taactggtaa gtttagtctt tttgtcttt atttcagtc  
901 ccggatccgg tgggtgtgca aatcaaagaa ctgctcctca tgggatgtg ctttacttc  
961 taggcctgta cggaagtgtt acttctgctc taaaagctgc ggaattgtac ccgcgccgc  
1021 tagcggcagc atggactctt tagccggctt agttctctgt ggagtcagct tgctcctta  
1081 tggagtagta gaaggcgcca tggacctgat ctgatcaat tccctacctc ttgtgtctga  
1141 tgccgaaaca tcctcacct gcattgcctc tgggtggcac cccatgagc ccatccat  
1201 aggaaggac tttgaagcct taatgaacca gcaccaagat ccaactggagg ttactcaaga  
1261 tgtgaccaga gaatggcgga aaaaagttgt ttggaagaga gaaaaggcca gtaagattaa  
1321 tgggtcttat ttctgtgaag gtcgagttc aggacaggct ataaggatac ggaccatgaa  
1381 gatgctcaa caagcatcct tctacctgc tactttaact atgacctgg acaggggaga  
1441 taatgtgaac atatcttca aaaaggtgtt aattaaagaa gaagatgcag tgatttaca  
1501 aatggctcc ttcatccact cagtgccccg gcatgaagta cctgatattt tagaagtca  
1561 cttgccgat gctcagcccc aggatgctgg tgtgtactc gccaggfaca taggaggaaa

1621 cctgttcacc tcagcctca ccaggctgat tgttcggaga tgtgaagctc agaagtggg  
1681 gcccgactgt agccgtcctt gtactacttg caagaacaat ggagtctgcc atgaagatac  
1741 cggggaatgc atttgcctc ctgggtttat ggggagaaca tgtgagaaag ctgtgagcc  
1801 gcacacattt ggcaggacct gtaaagaaag gtgtagtgga ccagaaggat gcaagtotta  
1861 tgtgttctgt ctcccagacc cttacgggtg ttctgtgcc acaggctgga gggggttgca  
1921 gtgcaatgaa gcatgccc atggttacta cggaccagac tgtaagctca ggtgccactg  
1981 taccaatgaa gagatatgtg atcggttcca aggatgcctc tgctctcaag gatggcaagg  
2041 gctgcagtgt gagaaagaag gcaggccaag gatgactcca cagatagagg atttgcaga  
2101 tcacattgaa gtaaacagtg gaaaatttaa ccccatctgc aaagcctctg ggtggccact  
2161 acctactagt gaagaaatga ccctagttaa gccagatggg acagtgtccc aaccaaata  
2221 ctcaactat acagatcgtt tctcagtggc catattcact gtcaaccgag tcttacctc  
2281 tgactcagga gtctgggtct gcagtgtgaa cacagtggct gggatgggtg aaaagcctt  
2341 caacatttcc gtcaaagttc ttccagagcc cctgcacgcc ccaaagtga ttgacactgg  
2401 acataacttt gctatcatca atatcagctc tgagccttac tttggggatg gacctatca  
2461 atccaagaag cttttctata aacctgtcaa tcaggcctgg aaatacattg aagtgcgaa  
2521 tgagattttc acttcaact acttgagacc gcgactgac tacgagctgt gtgtgcagct  
2581 ggcccgtcct ggagagggtg gagaagggca tctgggct gtgagacgat ttacaacagc  
2641 gtctatcgga ctccctctc caagaggctc cagtctctg ccaaaaagcc agacagctct  
2701 aaatttgact tggcaaccga tatttcaaaa ctcagaagat gaatttatg tggaagtga  
2761 gaggcgatcc ctgcaaaaa caagtatca gcagaacatc aaagtgcctg ggaacctgac  
2821 ctggtgcta ctgagcaact tagtcccag ggagcagtac acagtccgag ctgagtcaa  
2881 caccaaggcg cagggggagt ggagtgaaga actcagggcc tggaccctta gtgacattct  
2941 ccctctcaa ccagaaaaca tcaagatctc caacatcact gactccacag ctatggttc  
3001 ttgacaata gtggatggct atcgtttc ttccatcatc atccgtata aggttcaggg  
3061 caaaaatgaa gaccagcaca ttgatgtgaa gatcaagaat gctaccgta ctcagtacca  
3121 gctcaagggc ctgagccag agactacata ccatgtggat attttgctg agaacaacat  
3181 aggatcaagc aaccagcct ttctcatga actgaggacg ctccacatt cccagcctc  
3241 tgcagacctc ggagggggaa agatgctaga ctacaaggac gacgacgaca agtagacg

3301 tcgataatca acctctggat tacaaaatth gtgaaagatt gactggatt cttactatg  
3361 ttgctccttt tacgctatgt ggatacgtg ctftaatgcc ttgtatcat gctattgctt  
3421 cccgatggc ttccatttc tcctcctgt ataatcctg gttgctgtct cttatgagg  
3481 agttgtggcc cgttgtcagg caacgtggcg tgggtgcac tgtgttgct gacgcaacc  
3541 ccaactggtg gggcattgcc accacctgc agctccttc cgggacttc gcttcccc  
3601 tccctattgc cacggcggaa ctcatgccg cctgcctgc ccgctgctg acaggggctc  
3661 ggctgtggg cactgacaat tccgtggtg tgcggggaa gctgacgtcc ttccatggc  
3721 tgctcgctg tgttgccacc tggattctg gcgggacgtc ctctgctac gtccctcgg  
3781 ccctcaatcc agcggacctt cttcccgcg gctgctgcc ggctctcgg cctctccgc  
3841 gtcttcgct tcgccctcag acgagtcgga tctcccttg ggccgcctcc ccgctgatc  
3901 gcggccgcgg ggatccagac atgataagat acattgatga gtttgacaa accacaacta  
3961 gaatgcagt aaaaaaatgc ttattgtg aaattgtga tgctattgct ttattgtaa  
4021 ccattataag ctgcaataaa caagtaaca acaacaattg cattcattt atgttcagg  
4081 tcaggggga ggtgtgggag gttttcgg atcctctaga gtcgacctgc aggcattgaa  
4141 gctctagagc atggctacgt agataagtag catggcgggt taatcattaa ctacaaggaa  
4201 cccctagtga tggagttgc cactccctct ctgcgcgtc gctcgtcac tgaggccggg  
4261 cgaccaaaag tcgcccagc cccgggctt gccggggcg cctcagttag cgagcgagcg  
4321 cgccagctgg cgtaatagc aagaggccc caccgatgc cttccaac agttgcgag  
4381 cctgaatgc gaatggaatt ccagacgatt gagcgtcaaa atgtaggtat ttccatgagc  
4441 gttttcctg ttgcaatggc tggcggaat atgttctg atattaccag caaggccgat  
4501 agttgagtt ctctactca ggcaagtgat gttattacta atcaaagaag tattgcgaca  
4561 acggttaatt tgcgtgatg acagactct ttactcgtg gcctcactga ttataaaac  
4621 actctcagg attctggct accgttctg tctaaaatcc ctftaatcg cctcctgth  
4681 agtcccgc ctgattctaa cgaggaaagc acgtatac tgcctgcaa agcaaccata  
4741 gtacgcgcc ttagcggcg cattaagcgc ggcgggtg tggttacgc gcagcgtgac  
4801 cgctacact gccagcggc tagcggccgc tccttcgct ttctccctt ctttctcgc  
4861 cacgttcgcc ggcttcccc gtcaagctct aatcggggg ctcccttag gttccgatt  
4921 tagtgctta cggcacctc acccaaaaa actgattag ggtgatggt cacgtatgg

4981 gccatgccc tgatagacgg ttttcgccc ttgacgttg gagtccacgt tctttaatag  
5041 tggactcttg ttcaaactg gaacaacact caaccctatc tcggtctatt ctttgattt  
5101 ataagggatt ttgccgattt cggcctattg gttaaaaaat gagctgattt aacaaaaatt  
5161 taacgcgaat ttaacaaaa tattaacgtt tacaatttaa atatttgctt atacaatctt  
5221 cctgttttg gggctttct gattatcaac cggggtacat atgattgaca tgctagtttt  
5281 acgattaccg ttcatcgatt ctctgttg ctccagactc tcaggcaatg acctgatagc  
5341 cttgtagag acctctcaa aatagctacc ctctccggca tgaatttacc agctagaacg  
5401 gttgaatatc atattgatgg tgattgact gtctccggcc tttctaccc gttgaaatc  
5461 ttacctacac attactcagg cattgcattt aaaatatatg agggttctaa aaattttat  
5521 cctgctgtg aaataaaggc ttctcccgca aaagtattac agggtcataa tgttttggt  
5581 acaaccgatt tagctttatg ctctgaggct ttattgctta attttgctaa ttctttgct  
5641 tgcctgtatg atttattgga tgttgaatt cctgatgagg tattttctcc ttacgcatc  
5701 gtgcggtatt tcacaccgca tatggtgcac tctcagtaca atctgctctg atgccgcata  
5761 gttaagccag ccccgacacc cgccaacacc cgctgacgcg cctgacggg cttgtctgct  
5821 cccggcatcc gcttacagac aagctgtgac cgtctccggg agctgcatgt gtcagaggtt  
5881 ttaccgtca tcaccgaaac gcgcgagacg aaagggcctc gtgatacgcc tattttata  
5941 ggtaaatgtc atgataataa tggtttctta gacgtcagggt ggcactttc ggggaaatg  
6001 gcgcggaacc cctatttgtt tattttctta aatacattca aatatgtatc cgctcatgag  
6061 acaataacc tgataaatgc ttcaataata ttgaaaaagg aagagtatga gtattcaaca  
6121 ttccgtgtc gcccttattc cttttttgc ggcattttgc ctctctgtt ttgctaccc  
6181 agaaacgctg gtgaaagtaa aagatgctga agatcagttg ggtgcacgag tgggttacat  
6241 cgaactggat ctcaacagcg gtaagatcct tgagagtttt cgccccgaag aacgtttcc  
6301 aatgatgagc acttttaaag ttctgctatg tggcgcggta ttatcccgtat ttgacgccg  
6361 gcaagagcaa ctgggtcgcc gcatacacta ttctcagaat gacttggttg agtactacc  
6421 agtcacagaa aagcatctta cggatggcat gacagtaaga gaattatgca gtgctgccat  
6481 aaccatgagt gataaacctg cggccaactt acttctgaca acgatcggag gaccgaagga  
6541 gctaaccgct tttttgcaca acatggggga tcatgtaact cgcttgatc gttgggaacc  
6601 ggagctgaat gaagccatac caaacgacga gcgtgacacc acgatgcctg tagcaatggc



6661 aacaacgttg cgcaaactat taactggcga actactfact ctagcttccc ggcaacaatt  
6721 aatagactgg atggaggcgg ataaagttgc aggaccactt ctgcgctcgg cccttccggg  
6781 tggctggttt attgctgata aatctggagc cggtgagcgt gggctcgcg gtatcattgc  
6841 agcactgggg ccagatggta agccctcccg tatcgtagtt atctacacga cggggagtca  
6901 ggcaactatg gatgaacgaa atagacagat cgctgagata ggtgcctcac tgattaagca  
6961 ttgtaactg tcagaccaag ttactcata tatacttag attgattaa aacttcattt  
7021 ttaattaaa aggatctagg tgaagatcct tttgataat ccatgacca aaatccctta  
7081 acgtgagttt tcgtccact gagcgtcaga ccccgtagaa aagatcaaag gatcttctg  
7141 agatcctttt tttctgcgcg taatctgctg cttgcaaaca aaaaaaccac cgctaccagc  
7201 ggtggtttgt ttgccggatc aagagctacc aactctttt ccgaaggtaa ctggctcag  
7261 cagagcgcag ataccaaata ctgtccttct agttagccg tagttaggcc accactcaa  
7321 gaactctgta gcaccgcta catacctcgc tctgctaatc ctgttaccag tggctgctgc  
7381 cagtggcgt aagtcgtgtc ttaccgggtt ggactcaaga cgatagttac cggataaggg  
7441 gcagcggctg ggctgaacgg ggggttcgtg cacacagccc agcttgagc gaacgacct  
7501 caccgaactg agatacctac agcgtgagct atgagaaagc gccacgctc ccgaagggag  
7561 aaaggcggac aggtatccgg taagcggcag ggtcggaaca ggagagcgca cgagggagct  
7621 tccaggggga aacgcctggt atctttatag tctgtcggg ttcgccacc tctgactga  
7681 gcgtcgattt ttgtgatgct cgtcaggggg gcggagccta tggaaaaacg ccagcaacgc  
7741 ggcctttta cggttcctgg cctttgctg gcctttgct cacatgttct ttctgcgtt  
7801 atcccctgat tctgtggata accgtattac gcctttgag tgagctgata ccgctcgccg  
7861 cagccgaacg accgagcgca gcgagtcagt gagcgaggaa gcggaagagc gcccaatagc  
7921 caaacgcct ctccccgcgc gttggccgat t

\*mTie2-ECD-VSV-G-psubCMV-WPRE = mouse Tie2 - extracellular domain – vesicular stomatitis virus with glycoprotein G – cytomegalovirus plasmid - Woodchuck Hepatitis Virus Posttranscriptional Regulatory Element; AAV = adeno-associated virus; SV40 SD/SA = splice donor / splice enhancer from simian virus 40; pUC ori = replication origin from pUC plasmid; Amp = ampicillin; bps = base pairs; SP = signal peptide; poly A = poly A tail; FLAG = FLAG-tag; cds = coding sequence; ITR = inverted terminal repeat; IE = intronic enhancer.
